# Supplementary material for: Targeting Prostate Cancer Subtype 1 by Forkhead Box M1 Pathway Inhibition
Source: Oxford University Press journal article supplement (doi:10.1158/1078-0432.ccr-17-0901), 2017-09-12
Supplement: 10780432ccr170901-sup-180531_2_supp_4232797_7v77b3.xlsx [file 10780432ccr170901-sup-180531_2_supp_4232797_7v77b3.xlsx]

## Sheet: Sheet1
Supplementary Table S2. Cox regression analyses of FOXM1 as a prognostic factor for patients with prostate cancer.
	Correlation coefficient	Standard Error	P-value
Gleason Score	0.5124	0.0977	0.0001
PSA	-0.5126	0.1266	0.0001
